# Supplementary material for: Effect of cooking duration on carotenoid content, digestion and potential absorption efficiencies among refined semolina and whole wheat pasta products
Source: Royal Society of Chemistry journal article supplement (doi:10.1039/d2fo00611a), 2022-01-01
Supplement: d2fo00611a1.pdf [file d2fo00611a1.pdf]

|           |     |    |    |    |    |    |    |    |    |    |    |
|-----------|-----|----|----|----|----|----|----|----|----|----|----|
| Transcend | AI  | ND |
|           | FCT | ND |
|           | OC  | ND |

All values are means of four determinations (n=4). Pooled SE; Pooled standard error of means assuming equal variances. Data having the same lower-case superscripts within a column and carotenoid are not significantly different (p>0.05). #Cooking duration: AI, *al dente*; FCT, fully cooked time; OC, overcooked pasta. Independent variables are represented by the wheat cultivar (V) and cooking duration (CD). ND; Not detected (< LOD), all-trans lutein (LOD:1.04 µg/ml, LOQ: 3.14 µg/ml), all-trans zeaxanthin (LOD:0.31 µg/ml, LOQ: 0.93 µg/ml).

Table S1b. Significance of wheat cultivar, cooking duration and their interactions on the concentration of cis- carotenoids (mg/100g dry weight) in undigested and digested refined semolina (RS) Pasta

| Carotenoid    | Wheat Cultivar   | #Cooking duration | Undigested pasta | Digestion Stage |               |                             | Recovery (%) |                     |                                 | Bioaccessibility (%) |    |          |
|---------------|------------------|-------------------|------------------|-----------------|---------------|-----------------------------|--------------|---------------------|---------------------------------|----------------------|----|----------|
|               |                  |                   |                  | Oral            | Oral+ Gastric | Oral + Gastric + Intestinal | Oral Stage   | Oral +Gastric Stage | Oral +Gastric+ intestinal stage |                      |    |          |
| 15-cis lutein | AAC Spitfire     | AI                | 0.05a            | 0.04b           | 0.04a         | 0.06a                       | 81.70abc     | 79.67a              | 117.13a                         | 0.07ab               | ND | 129.85ab |
|               |                  | FCT               | 0.07a            | 0.05ab          | 0.04a         | 0.05a                       | 69.81bc      | 58.28a              | 76.80a                          | 0.06ab               | ND | 87.65ab  |
|               |                  | OC                | 0.06a            | 0.05ab          | 0.03a         | 0.05a                       | 86.11abc     | 49.85a              | 78.23a                          | 0.06ab               | ND | 102.37ab |
|               | CDC Precision    | AI                | 0.05a            | 0.05ab          | 0.04a         | 0.05a                       | 101.83ab     | 75.25a              | 91.99a                          | 0.08ab               | ND | 152.10ab |
|               |                  | FCT               | 0.06a            | 0.04ab          | 0.03a         | 0.04a                       | 76.33bc      | 49.91a              | 70.27a                          | 0.07ab               | ND | 116.51ab |
|               |                  | OC                | 0.06a            | 0.05ab          | 0.03a         | 0.05a                       | 83.47abc     | 61.02a              | 87.15a                          | 0.04b                | ND | 74.56b   |
|               | Transcend        | AI                | 0.05a            | 0.06a           | 0.03a         | 0.05a                       | 114.22a      | 62.80a              | 104.57a                         | 0.11a                | ND | 195.23a  |
|               |                  | FCT               | 0.06a            | 0.05ab          | 0.04a         | 0.06a                       | 97.42ab      | 74.40a              | 100.11a                         | 0.07ab               | ND | 122.41ab |
|               |                  | OC                | 0.07a            | 0.04b           | 0.03a         | 0.04a                       | 57.16c       | 50.88a              | 57.83a                          | 0.05b                | ND | 76.12b   |
|               | <i>Pooled SE</i> |                   | 0.004            | 0.004           | 0.006         | 0.006                       | 0.078        | 0.097               | 0.128                           | 0.012                |    | 22.121   |
|               | <i>P-value</i>   | <i>V</i>          | 0.350            | 0.409           | 0.872         | 0.268                       | 0.250        | 0.996               | 0.767                           | 0.380                |    | 0.397    |
|               |                  | <i>CD</i>         | 0.084            | 0.046           | 0.468         | 0.066                       | 0.003        | 0.076               | 0.021                           | 0.005                |    | 0.002    |
|               |                  | <i>V*CD</i>       | 0.259            | 0.002           | 0.587         | 0.258                       | 0.003        | 0.251               | 0.158                           | 0.219                |    | 0.327    |

|                |                  |                  |              |              |              |              |              |              |                  |              |                  |               |
|----------------|------------------|------------------|--------------|--------------|--------------|--------------|--------------|--------------|------------------|--------------|------------------|---------------|
| 13-cis lutein  | AAC Spitfire     | AI               | 0.06b        | 0.05b        | 0.05a        | 0.08a        | 83.61ab      | 80.36a       | 132.38a          | 0.09bcd      | ND               | 134.39abc     |
|                |                  | FCT              | 0.08ab       | 0.06ab       | 0.05a        | 0.07a        | 71.5b        | 64.60a       | 85.28a           | 0.09bcd      | ND               | 103.24bc      |
|                |                  | OC               | 0.08ab       | 0.07ab       | 0.05a        | 0.08a        | 90.76ab      | 55.17a       | 99.87a           | 0.09bcd      | ND               | 112.61abc     |
|                | CDC Precision    | AI               | 0.08ab       | 0.07ab       | 0.05a        | 0.07a        | 93.38ab      | 63.06a       | 86.74a           | 0.12a        | ND               | 156.90a       |
|                |                  | FCT              | 0.09a        | 0.07ab       | 0.05a        | 0.08a        | 82.43ab      | 51.28a       | 85.92a           | 0.13a        | ND               | 130.16abc     |
|                |                  | OC               | 0.09a        | 0.08a        | 0.06a        | 0.10a        | 82.90ab      | 64.31a       | 103.18a          | 0.08cd       | ND               | 86.46c        |
|                | Transcend        | AI               | 0.07ab       | 0.08a        | 0.04a        | 0.07a        | 117.76a      | 53.72a       | 99.27a           | 0.11abc      | ND               | 146.19ab      |
|                |                  | FCT              | 0.08ab       | 0.07ab       | 0.06a        | 0.09a        | 99.92ab      | 73.53a       | 116.80a          | 0.11ab       | ND               | 137.24abc     |
|                |                  | OC               | 0.09ab       | 0.05b        | 0.05a        | 0.06a        | 56.94b       | 55.45a       | 74.45a           | 0.08d        | ND               | 87.83c        |
|                | <i>Pooled SE</i> |                  | <i>0.007</i> | <i>0.005</i> | <i>0.009</i> | <i>0.008</i> | <i>0.097</i> | <i>0.085</i> | <i>0.141</i>     | <i>0.005</i> |                  | <i>10.287</i> |
| <i>P-value</i> | <i>V</i>         | <i>0.090</i>     | <i>0.011</i> | <i>0.756</i> | <i>0.590</i> | <i>0.490</i> | <i>0.554</i> | <i>0.483</i> | <i>0.000</i>     |              | <i>0.604</i>     |               |
|                | <i>CD</i>        | <i>0.003</i>     | <i>0.865</i> | <i>0.522</i> | <i>0.297</i> | <i>0.037</i> | <i>0.562</i> | <i>0.480</i> | <i>&lt;.0001</i> |              | <i>&lt;.0001</i> |               |
|                | <i>V*CD</i>      | <i>0.806</i>     | <i>0.000</i> | <i>0.577</i> | <i>0.051</i> | <i>0.011</i> | <i>0.119</i> | <i>0.070</i> | <i>0.002</i>     |              | <i>0.052</i>     |               |
| 13'-cis lutein | AAC Spitfire     | AI               | 0.04c        | 0.03b        | 0.03a        | 0.05ab       | 89.83ab      | 90.44a       | 144.55a          | 0.06bc       | ND               | 164.76a       |
|                |                  | FCT              | 0.05abc      | 0.04ab       | 0.04a        | 0.05b        | 80.62ab      | 80.27a       | 100.28a          | 0.06c        | ND               | 124.53abc     |
|                |                  | OC               | 0.05ab       | 0.05a        | 0.04a        | 0.06ab       | 96.58ab      | 67.82a       | 116.81a          | 0.07abc      | ND               | 126.97abc     |
|                | CDC Precision    | AI               | 0.04bc       | 0.05ab       | 0.04a        | 0.04b        | 109.63ab     | 80.16a       | 101.28a          | 0.07abc      | ND               | 172.00a       |
|                |                  | FCT              | 0.05ab       | 0.05a        | 0.04a        | 0.05ab       | 96.37ab      | 66.99a       | 102.78a          | 0.08a        | ND               | 143.14abc     |
|                |                  | OC               | 0.06a        | 0.05a        | 0.05a        | 0.07a        | 88.79ab      | 80.29a       | 125.38a          | 0.06bc       | ND               | 105.48c       |
|                | Transcend        | AI               | 0.04bc       | 0.05a        | 0.03a        | 0.04b        | 124.32a      | 62.29a       | 108.58a          | 0.07abc      | ND               | 158.50ab      |
|                |                  | FCT              | 0.05abc      | 0.05a        | 0.04a        | 0.06ab       | 104.54ab     | 82.71a       | 128.27a          | 0.08ab       | ND               | 150.85abc     |
|                |                  | OC               | 0.05ab       | 0.04ab       | 0.04a        | 0.05ab       | 67.32b       | 70.29a       | 93.21a           | 0.06bc       | ND               | 111.61bc      |
|                | <i>Pooled SE</i> |                  | <i>0.003</i> | <i>0.003</i> | <i>0.006</i> | <i>0.005</i> | <i>0.099</i> | <i>0.106</i> | <i>0.149</i>     | <i>0.003</i> |                  | <i>10.580</i> |
| <i>P-value</i> | <i>V</i>         | <i>0.052</i>     | <i>0.004</i> | <i>0.678</i> | <i>0.500</i> | <i>0.413</i> | <i>0.675</i> | <i>0.605</i> | <i>0.019</i>     |              | <i>0.980</i>     |               |
|                | <i>CD</i>        | <i>&lt;.0001</i> | <i>0.563</i> | <i>0.247</i> | <i>0.010</i> | <i>0.024</i> | <i>0.841</i> | <i>0.797</i> | <i>0.015</i>     |              | <i>&lt;.0001</i> |               |
|                | <i>V*CD</i>      | <i>0.971</i>     | <i>0.000</i> | <i>0.643</i> | <i>0.036</i> | <i>0.037</i> | <i>0.329</i> | <i>0.104</i> | <i>0.008</i>     |              | <i>0.228</i>     |               |
| AAC            | AI               | 0.05b            | 0.04c        | 0.04a        | 0.06a        | 72.22bcd     | 86.65a       | 121.66a      | 0.06b            | ND           | 118.64abc        |               |
|                | FCT              | 0.07ab           | 0.04bc       | 0.05a        | 0.05a        | 62.85cd      | 68.18a       | 79.43a       | 0.06b            | ND           | 87.60c           |               |

|                  |                                    |             |        |         |        |       |           |           |          |        |        |          |          |
|------------------|------------------------------------|-------------|--------|---------|--------|-------|-----------|-----------|----------|--------|--------|----------|----------|
| 9-cis<br>lutein  | Spitfire                           | OC          | 0.06ab | 0.05abc | 0.04a  | 0.06a | 83.37abcd | 63.62a    | 96.34a   | 0.06b  | ND     | 96.38bc  |          |
|                  |                                    | CDC         | AI     | 0.06ab  | 0.06ab | 0.05a | 0.05a     | 94.32abc  | 74.76a   | 88.42a | 0.09a  | ND       | 146.18a  |
|                  |                                    |             | FCT    | 0.07a   | 0.06ab | 0.04a | 0.05a     | 82.28abcd | 60.99a   | 79.56a | 0.10a  | ND       | 138.34ab |
|                  | Precision                          | OC          | 0.07a  | 0.06ab  | 0.05a  | 0.07a | 78.47abcd | 72.74a    | 97.85a   | 0.06b  | ND     | 84.71c   |          |
|                  |                                    | Transcend   | AI     | 0.06ab  | 0.06a  | 0.03a | 0.05a     | 109.10a   | 58.92a   | 91.71a | 0.08a  | ND       | 136.85ab |
|                  | FCT                                |             | 0.06ab | 0.06ab  | 0.05a  | 0.07a | 98.29ab   | 85.97a    | 111.35a  | 0.08a  | ND     | 139.84ab |          |
|                  | <i>Pooled SE</i><br><i>P-value</i> | OC          | 0.07a  | 0.04bc  | 0.04a  | 0.05a | 56.82d    | 56.24a    | 68.16a   | 0.06b  | ND     | 85.02c   |          |
|                  |                                    | <i>V</i>    | 0.004  | 0.004   | 0.008  | 0.007 | 0.072     | 0.127     | 0.126    | 0.004  |        | 9.392    |          |
|                  |                                    | <i>CD</i>   | 0.082  | <.0001  | 0.678  | 0.736 | 0.035     | 0.857     | 0.555    | <.0001 |        | 0.018    |          |
|                  |                                    | <i>V*CD</i> | 0.002  | 0.746   | 0.687  | 0.668 | 0.012     | 0.644     | 0.412    | <.0001 |        | <.0001   |          |
| 9'-cis<br>Lutein | AAC<br>Spitfire                    | AI          | 0.04c  | 0.03c   | 0.04a  | 0.05a | 77.07bcd  | 91.02a    | 129.92a  | 0.05b  | ND     | 124.81bc |          |
|                  |                                    | FCT         | 0.06ab | 0.04bc  | 0.04a  | 0.05a | 65.60cd   | 69.96a    | 83.79ab  | 0.05b  | ND     | 90.18d   |          |
|                  |                                    | OC          | 0.06ab | 0.05abc | 0.04a  | 0.06a | 86.99abcd | 66.05a    | 104.15ab | 0.06b  | ND     | 94.51cd  |          |
|                  | CDC<br>Precision                   | AI          | 0.05bc | 0.05ab  | 0.04a  | 0.05a | 98.53abc  | 84.59a    | 96.88ab  | 0.09a  | ND     | 161.72a  |          |
|                  |                                    | FCT         | 0.06ab | 0.05ab  | 0.04a  | 0.05a | 88.53abcd | 68.19a    | 88.01ab  | 0.09a  | ND     | 148.17ab |          |
|                  | Transcend                          | OC          | 0.06ab | 0.06a   | 0.05a  | 0.07a | 87.72abcd | 76.10a    | 113.82ab | 0.06b  | ND     | 87.52d   |          |
|                  |                                    | AI          | 0.05bc | 0.06a   | 0.03a  | 0.05a | 117.15a   | 63.18a    | 98.63ab  | 0.08a  | ND     | 149.75ab |          |
|                  | <i>Pooled SE</i><br><i>P-value</i> | FCT         | 0.05bc | 0.05ab  | 0.05a  | 0.07a | 106.78ab  | 94.78a    | 125.98ab | 0.08a  | ND     | 155.69ab |          |
|                  |                                    | OC          | 0.07a  | 0.04bc  | 0.04a  | 0.05a | 57.37d    | 61.62a    | 71.96b   | 0.06b  | ND     | 86.93d   |          |
|                  |                                    | <i>V</i>    | 0.003  | 0.004   | 0.008  | 0.007 | 0.070     | 0.149     | 0.126    | 0.003  |        | 6.915    |          |
| <i>CD</i>        |                                    | 0.023       | 0.000  | 0.596   | 0.596  | 0.010 | 0.964     | 0.757     | <.0001   |        | <.0001 |          |          |
| <i>V*CD</i>      | <i>CD</i>                          | <.0001      | 0.889  | 0.557   | 0.333  | 0.006 | 0.596     | 0.468     | <.0001   |        | <.0001 |          |          |
|                  | <i>V*CD</i>                        | 0.014       | 0.000  | 0.839   | 0.103  | 0.000 | 0.385     | 0.014     | <.0001   |        | 0.0004 |          |          |

All values are means of four determinations (n=4). Pooled SE; Pooled standard error of means assuming equal variances. Data having the same lower-case superscripts within a column and carotenoid are not significantly different (p>0.05). #Cooking duration: AI, *al dente*; FCT, fully cooked time; OC, overcooked pasta. Independent variables are represented by the wheat cultivar (V) and cooking duration (CD). ND; Not detected (<LOD).

Table S2a. Significance of wheat cultivar, cooking duration and their interactions on the concentration of all- trans carotenoids (mg/100g dry weight) in undigested and digested whole wheat (WWF) Pasta

| Carotenoid        | Wheat Cultivar   | #Cooking duration | Undigested pasta | Digestion Stage |               |                             | Recovery (%) |                     |                                  |              | Bio-accessibility (%) |               |
|-------------------|------------------|-------------------|------------------|-----------------|---------------|-----------------------------|--------------|---------------------|----------------------------------|--------------|-----------------------|---------------|
|                   |                  |                   |                  | Oral            | Oral+ Gastric | Oral + Gastric + Intestinal | Oral Stage   | Oral +Gastric Stage | Oral +Gastric + intestinal stage | Filtrate     |                       | Residue       |
| All- trans Lutein | AAC Spitfire     | AI                | 0.97a            | 1.07a           | 1.03a         | 1.00a                       | 109.06ab     | 100.86a             | 104.78a                          | 0.97ab       | 0.24b                 | 99.13b        |
|                   |                  | FCT               | 0.84a            | 0.78a           | 0.92a         | 0.92a                       | 94.84ab      | 108.21a             | 109.13a                          | 0.77b        | 0.48ab                | 96.51b        |
|                   |                  | OC                | 0.83a            | 0.90a           | 1.41a         | 1.05a                       | 112.23ab     | 175.43a             | 132.44a                          | 0.95ab       | 0.33ab                | 116.45ab      |
|                   | CDC Precision    | AI                | 0.82a            | 0.90a           | 1.15a         | 0.87a                       | 109.99ab     | 138.8a              | 107.67a                          | 0.81b        | 0.26ab                | 97.52b        |
|                   |                  | FCT               | 0.98a            | 0.67a           | 1.84a         | 1.09a                       | 69.78b       | 198.76a             | 111.66a                          | 0.87ab       | 0.41ab                | 89.17b        |
|                   |                  | OC                | 1.09a            | 1.03a           | 1.17a         | 0.96a                       | 95.72ab      | 118.64a             | 91.97a                           | 1.24ab       | 0.56ab                | 116.71ab      |
|                   | Transcend        | AI                | 0.78a            | 1.01a           | 1.39a         | 0.99a                       | 131.79a      | 176.74a             | 129.21a                          | 1.31a        | 0.47ab                | 170.43a       |
|                   |                  | FCT               | 0.99a            | 0.82a           | 1.29a         | 1.09a                       | 83.69ab      | 130.94a             | 110.45a                          | 1.25ab       | 0.58ab                | 126.82ab      |
|                   |                  | OC                | 0.95a            | 1.10a           | 1.04a         | 1.12a                       | 119.57ab     | 120.86a             | 122.63a                          | 1.12ab       | 0.58a                 | 119.92ab      |
|                   | <i>Pooled SE</i> |                   | <i>0.070</i>     | <i>0.104</i>    | <i>0.232</i>  | <i>0.074</i>                | <i>0.130</i> | <i>0.321</i>        | <i>0.121</i>                     | <i>0.101</i> | <i>0.063</i>          | <i>12.748</i> |
|                   | <i>P-value</i>   | <i>V</i>          | <i>0.363</i>     | <i>0.448</i>    | <i>0.371</i>  | <i>0.256</i>                | <i>0.179</i> | <i>0.662</i>        | <i>0.231</i>                     | <i>0.001</i> | <i>0.010</i>          | <i>0.002</i>  |
|                   |                  | <i>CD</i>         | <i>0.137</i>     | <i>0.010</i>    | <i>0.664</i>  | <i>0.272</i>                | <i>0.009</i> | <i>0.948</i>        | <i>0.864</i>                     | <i>0.255</i> | <i>0.011</i>          | <i>0.211</i>  |
|                   |                  | <i>V*CD</i>       | <i>0.052</i>     | <i>0.602</i>    | <i>0.116</i>  | <i>0.296</i>                | <i>0.746</i> | <i>0.128</i>        | <i>0.274</i>                     | <i>0.033</i> | <i>0.199</i>          | <i>0.070</i>  |

|                         |                  |              |              |              |              |              |              |              |              |                  |              |                  |
|-------------------------|------------------|--------------|--------------|--------------|--------------|--------------|--------------|--------------|--------------|------------------|--------------|------------------|
| All trans<br>Zeaxanthin | AAC<br>Spitfire  | AI           | 0.02a        | 0.02ab       | 0.02a        | 0.03ab       | 108.4a       | 89.76a       | 135.04a      | 0.02cd           | 0.03d        | 114.82c          |
|                         |                  | FCT          | 0.02a        | 0.02bc       | 0.02a        | 0.03ab       | 93.67a       | 97.74a       | 137.62a      | 0.02d            | 0.05a        | 113.85c          |
|                         |                  | OC           | 0.02a        | 0.02abc      | 0.03a        | 0.03ab       | 101.23a      | 135.97a      | 158.35a      | 0.03bcd          | ND           | 135.35abc        |
|                         | CDC<br>Precision | AI           | 0.02a        | 0.02bc       | 0.02a        | 0.02b        | 101.6a       | 120.15a      | 133.22a      | 0.02d            | ND           | 120.72bc         |
|                         |                  | FCT          | 0.02a        | 0.02c        | 0.03a        | 0.03ab       | 91.98a       | 181.87a      | 153.55a      | 0.02cd           | 0.04bc       | 130.29abc        |
|                         |                  | OC           | 0.02a        | 0.02abc      | 0.02a        | 0.03ab       | 96.37a       | 112.75a      | 132.06a      | 0.03abcd         | ND           | 141.79abc        |
|                         | Transcend        | AI           | 0.02a        | 0.02ab       | 0.03a        | 0.03ab       | 114.24a      | 146.58a      | 155.35a      | 0.03a            | 0.04cd       | 184.42ab         |
|                         |                  | FCT          | 0.02a        | 0.02abc      | 0.03a        | 0.03a        | 114.19a      | 177.31a      | 185.42a      | 0.03ab           | 0.04bc       | 197.94a          |
|                         |                  | OC           | 0.02a        | 0.02a        | 0.03a        | 0.03a        | 129.07a      | 138.26a      | 175.86a      | 0.03abc          | 0.04ab       | 176.88abc        |
|                         | <i>Pooled SE</i> |              | <i>0.001</i> | <i>0.001</i> | <i>0.004</i> | <i>0.002</i> | <i>0.090</i> | <i>0.213</i> | <i>0.136</i> | <i>0.002</i>     | <i>0.001</i> | <i>14.593</i>    |
|                         | <i>P-value</i>   | <i>V</i>     | <i>0.245</i> | <i>0.001</i> | <i>0.093</i> | <i>0.001</i> | <i>0.012</i> | <i>0.047</i> | <i>0.013</i> | <i>&lt;.0001</i> | <i>0.029</i> | <i>&lt;.0001</i> |
|                         |                  | <i>CD</i>    | <i>0.145</i> | <i>0.006</i> | <i>0.480</i> | <i>0.124</i> | <i>0.417</i> | <i>0.172</i> | <i>0.260</i> | <i>0.182</i>     | <i>0.000</i> | <i>0.632</i>     |
|                         | <i>V*CD</i>      | <i>0.335</i> | <i>0.171</i> | <i>0.255</i> | <i>0.440</i> | <i>0.752</i> | <i>0.183</i> | <i>0.560</i> | <i>0.054</i> | <i>0.001</i>     | <i>0.638</i> |                  |

All values are means of four determinations (n=4). Pooled SE; Pooled standard error of means assuming equal variances. Data having the same lower-case superscripts within a column and carotenoid are not significantly different ( $p>0.05$ ). #Cooking duration: AI, *al dente*; FCT, fully cooked time; OC, overcooked pasta. Independent variables are represented by the wheat cultivar (V) and cooking duration (CD). ND; Not detected (< LOD), all-trans lutein (LOD:1.04  $\mu\text{g/ml}$ , LOQ: 3.14  $\mu\text{g/ml}$ ), all-trans zeaxanthin (LOD:0.31  $\mu\text{g/ml}$ , LOQ: 0.93  $\mu\text{g/ml}$ ).

Table S2b. Significance of wheat cultivar, cooking duration and their interactions on the concentration of cis- carotenoids (mg/100g dry weight) in undigested and digested whole wheat (WWF) Pasta

| Carotenoid    | Wheat Cultivar   | #Cooking duration | Undigested pasta | Digestion Stage |               |                             | Recovery (%) |                     |                                 | Filtrate | Residue | Bioaccessibility (%) |
|---------------|------------------|-------------------|------------------|-----------------|---------------|-----------------------------|--------------|---------------------|---------------------------------|----------|---------|----------------------|
|               |                  |                   |                  | Oral            | Oral+ Gastric | Oral + Gastric + Intestinal | Oral Stage   | Oral +Gastric Stage | Oral +Gastric+ intestinal stage |          |         |                      |
| 15-cis lutein | AAC Spitfire     | AI                | 0.06a            | 0.05a           | 0.05a         | 0.04ab                      | 94.46ab      | 87.85a              | 77.56a                          | 0.05ab   | ND      | 88.56a               |
|               |                  | FCT               | 0.04a            | 0.04abc         | 0.05a         | 0.04ab                      | 89.88ab      | 106.86a             | 86.31a                          | 0.04ab   | ND      | 93.19a               |
|               |                  | OC                | 0.05a            | 0.04abc         | 0.06a         | 0.05a                       | 86.59ab      | 112.7a              | 95.56a                          | 0.04ab   | ND      | 88.54a               |
|               | CDC Precision    | AI                | 0.04a            | 0.04abc         | 0.05a         | 0.03b                       | 98.38ab      | 106.27a             | 81.68a                          | 0.04b    | ND      | 88.90a               |
|               |                  | FCT               | 0.05a            | 0.03c           | 0.05a         | 0.04ab                      | 60.24b       | 105.98a             | 75.32a                          | 0.04b    | ND      | 79.33a               |
|               |                  | OC                | 0.05a            | 0.03bc          | 0.04a         | 0.04ab                      | 69.68ab      | 83.18a              | 80.52a                          | 0.04ab   | ND      | 92.11a               |
|               | Transcend        | AI                | 0.04a            | 0.05ab          | 0.05a         | 0.04ab                      | 111.1ab      | 118.71a             | 81.37a                          | 0.05a    | ND      | 118.23a              |
|               |                  | FCT               | 0.04a            | 0.04abc         | 0.05a         | 0.04ab                      | 88.17ab      | 118.33a             | 93.56a                          | 0.05ab   | ND      | 118.03a              |
|               |                  | OC                | 0.04a            | 0.05ab          | 0.04a         | 0.05a                       | 124.04a      | 98.27a              | 116.06a                         | 0.05ab   | ND      | 124.19a              |
|               | <i>Pooled SE</i> |                   | 0.004            | 0.003           | 0.007         | 0.003                       | 0.117        | 0.160               | 0.101                           | 0.003    |         | 12.850               |
|               | <i>P-value</i>   | <i>V</i>          | 0.123            | 0.000           | 0.530         | 0.010                       | 0.010        | 0.589               | 0.113                           | 0.001    |         | 0.006                |
|               |                  | <i>CD</i>         | 0.716            | 0.000           | 0.724         | 0.014                       | 0.086        | 0.647               | 0.119                           | 0.357    |         | 0.900                |

|                |               |                  |              |              |                  |              |                  |              |              |              |              |                  |              |
|----------------|---------------|------------------|--------------|--------------|------------------|--------------|------------------|--------------|--------------|--------------|--------------|------------------|--------------|
|                |               | <i>V*CD</i>      | <i>0.167</i> | <i>0.654</i> | <i>0.485</i>     | <i>0.356</i> | <i>0.274</i>     | <i>0.592</i> | <i>0.523</i> | <i>0.127</i> | <i>0.966</i> |                  |              |
| 13-cis lutein  | AAC Spitfire  | AI               | 0.09a        | 0.07ab       | 0.07a            | 0.08ab       | 82.74ab          | 78.25a       | 93.48a       | 0.08a        | 0.05d        | 95.06a           |              |
|                |               | FCT              | 0.09a        | 0.07ab       | 0.08a            | 0.08ab       | 74.74ab          | 92.19a       | 95.88a       | 0.08a        | 0.09a        | 95.27a           |              |
|                |               | OC               | 0.09a        | 0.07ab       | 1.10a            | 0.10ab       | 82.15ab          | 109.79a      | 112.25a      | 0.10a        | 0.06cd       | 106.78a          |              |
|                | CDC Precision | AI               | 0.08a        | 0.06ab       | 0.07a            | 0.08b        | 72.16ab          | 90.42a       | 96.73a       | 0.08a        | 0.05d        | 99.26a           |              |
|                |               | FCT              | 0.09a        | 0.05b        | 0.11a            | 0.10ab       | 56.48b           | 137.87a      | 117.71a      | 0.09a        | 0.07cd       | 98.09a           |              |
|                |               | OC               | 0.11a        | 0.08ab       | 0.09a            | 0.09ab       | 67.94ab          | 86.19a       | 85.80a       | 0.12a        | 0.07bc       | 104.70a          |              |
|                | Transcend     | AI               | 0.08a        | 0.08ab       | 0.10a            | 0.08ab       | 97.64ab          | 120.65a      | 102.19a      | 0.11a        | 0.07bc       | 133.25a          |              |
|                |               | FCT              | 0.09a        | 0.07ab       | 0.10a            | 0.10ab       | 85.92ab          | 143.49a      | 119.92a      | 0.11a        | 0.08abc      | 134.11a          |              |
|                |               | OC               | 0.09a        | 0.08a        | 0.08a            | 0.10a        | 113.32a          | 96.54a       | 135.18a      | 0.11a        | 0.09ab       | 146.37a          |              |
|                |               | <i>Pooled SE</i> | <i>0.010</i> | <i>0.006</i> | <i>0.015</i>     | <i>0.005</i> | <i>0.112</i>     | <i>0.262</i> | <i>0.176</i> | <i>0.008</i> | <i>0.003</i> | <i>18.657</i>    |              |
|                |               | <i>P-value</i>   | <i>V</i>     | <i>0.401</i> | <i>0.013</i>     | <i>0.755</i> | <i>0.608</i>     | <i>0.004</i> | <i>0.469</i> | <i>0.335</i> | <i>0.014</i> | <i>0.001</i>     | <i>0.027</i> |
|                |               |                  | <i>CD</i>    | <i>0.194</i> | <i>0.014</i>     | <i>0.408</i> | <i>0.001</i>     | <i>0.230</i> | <i>0.353</i> | <i>0.555</i> | <i>0.032</i> | <i>&lt;.0001</i> | <i>0.748</i> |
|                |               | <i>V*CD</i>      | <i>0.540</i> | <i>0.636</i> | <i>0.392</i>     | <i>0.279</i> | <i>0.864</i>     | <i>0.649</i> | <i>0.578</i> | <i>0.188</i> | <i>0.001</i> | <i>0.999</i>     |              |
| 13'-cis lutein | AAC Spitfire  | AI               | 0.05ab       | 0.03bc       | 0.04a            | 0.05cd       | 65.28abc         | 70.44a       | 103.69a      | 0.05c        | 0.04de       | 103.54a          |              |
|                |               | FCT              | 0.05ab       | 0.04bc       | 0.04a            | 0.06bcd      | 67.43abc         | 80.44a       | 108.40a      | 0.05bc       | 0.07ab       | 105.76a          |              |
|                |               | OC               | 0.06ab       | 0.04ab       | 0.06a            | 0.07ab       | 73.54abc         | 105.73a      | 115.51a      | 0.07abc      | 0.05cde      | 114.05a          |              |
|                | CDC Precision | AI               | 0.05ab       | 0.03c        | 0.04a            | 0.05d        | 54.02bc          | 79.06a       | 103.8a       | 0.05c        | 0.04e        | 104.40a          |              |
|                |               | FCT              | 0.06ab       | 0.03c        | 0.07a            | 0.07abc      | 41.33c           | 105.07a      | 107.05a      | 0.06abc      | 0.05cd       | 93.53a           |              |
|                |               | OC               | 0.07a        | 0.04ab       | 0.06a            | 0.06abcd     | 62.38abc         | 87.14a       | 94.02a       | 0.08a        | 0.05cd       | 115.89a          |              |
|                | Transcend     | AI               | 0.05b        | 0.04abc      | 0.05a            | 0.05d        | 84.56ab          | 108.18a      | 107.33a      | 0.07abc      | 0.05cd       | 149.97a          |              |
|                |               | FCT              | 0.06ab       | 0.04abc      | 0.07a            | 0.07abc      | 68.18abc         | 129.02a      | 118.07a      | 0.08ab       | 0.06bc       | 136.03a          |              |
|                |               | OC               | 0.06ab       | 0.05a        | 0.05a            | 0.08a        | 94.53a           | 95.42a       | 147.29a      | 0.08a        | 0.08a        | 159.03a          |              |
|                |               | <i>Pooled SE</i> | <i>0.005</i> | <i>0.003</i> | <i>0.009</i>     | <i>0.003</i> | <i>0.079</i>     | <i>0.202</i> | <i>0.149</i> | <i>0.005</i> | <i>0.003</i> | <i>19.399</i>    |              |
|                |               | <i>P-value</i>   | <i>V</i>     | <i>0.244</i> | <i>0.001</i>     | <i>0.456</i> | <i>0.251</i>     | <i>0.000</i> | <i>0.289</i> | <i>0.186</i> | <i>0.001</i> | <i>0.000</i>     | <i>0.017</i> |
|                |               |                  | <i>CD</i>    | <i>0.006</i> | <i>&lt;.0001</i> | <i>0.061</i> | <i>&lt;.0001</i> | <i>0.035</i> | <i>0.528</i> | <i>0.522</i> | <i>0.000</i> | <i>&lt;.0001</i> | <i>0.534</i> |



|               |               |                  |           |       |       |       |         |         |         |          |        |         |        |
|---------------|---------------|------------------|-----------|-------|-------|-------|---------|---------|---------|----------|--------|---------|--------|
|               |               | <i>V*CD</i>      | 0.476     | 0.514 | 0.291 | 0.056 | 0.701   | 0.637   | 0.527   | 0.222    | 0.001  | 0.992   |        |
| 9-cis lutein  | AAC Spitfire  | AI               | 0.06a     | 0.06a | 0.06a | 0.06a | 102.67a | 90.36a  | 94.13a  | 0.06ab   | 0.05b  | 93.40a  |        |
|               |               | FCT              | 0.06a     | 0.05a | 0.06a | 0.06a | 91.27a  | 99.21a  | 100.02a | 0.05b    | 0.06a  | 91.22a  |        |
|               |               | OC               | 0.06a     | 0.05a | 0.08a | 0.07a | 98.50a  | 144.49a | 118.6a  | 0.06ab   | ND     | 103.86a |        |
|               | CDC Precision | AI               | 0.06a     | 0.05a | 0.07a | 0.05a | 91.26a  | 116.05a | 91.35a  | 0.05ab   | ND     | 91.40a  |        |
|               |               | FCT              | 0.07a     | 0.04a | 0.10a | 0.07a | 67.29a  | 160.8a  | 103.51a | 0.06ab   | 0.06ab | 86.97a  |        |
|               |               | OC               | 0.07a     | 0.06a | 0.07a | 0.06a | 85.78a  | 107.11a | 92.22a  | 0.07ab   | ND     | 107.05a |        |
|               | Transcend     | AI               | 0.05a     | 0.06a | 0.08a | 0.06a | 122.39a | 154.08a | 116.79a | 0.08a    | 0.05ab | 146.88a |        |
|               |               | FCT              | 0.06a     | 0.05a | 0.08a | 0.07a | 88.00a  | 133.02a | 119.48a | 0.07ab   | 0.06ab | 128.46a |        |
|               |               | OC               | 0.06a     | 0.06a | 0.06a | 0.07a | 133.25a | 125.37a | 141.4a  | 0.07ab   | 0.07a  | 149.53a |        |
|               |               | <i>Pooled SE</i> |           | 0.005 | 0.005 | 0.012 | 0.004   | 0.161   | 0.242   | 0.146    | 0.006  | 0.003   | 18.917 |
|               |               | <i>P-value</i>   | <i>V</i>  | 0.101 | 0.303 | 0.293 | 0.224   | 0.058   | 0.425   | 0.047    | 0.002  | 0.311   | 0.007  |
|               |               |                  | <i>CD</i> | 0.608 | 0.028 | 0.662 | 0.029   | 0.139   | 0.861   | 0.385    | 0.284  | 0.011   | 0.518  |
|               |               | <i>V*CD</i>      | 0.504     | 0.674 | 0.129 | 0.257 | 0.818   | 0.232   | 0.788   | 0.115    | 0.132  | 0.992   |        |
| 9'-cis Lutein | AAC Spitfire  | AI               | 0.05a     | 0.05a | 0.05a | 0.06a | 107.26a | 90.607a | 112.34a | 0.05bcd  | ND     | 98.12a  |        |
|               |               | FCT              | 0.05a     | 0.04a | 0.05a | 0.05a | 93.71a  | 103.55a | 111.44a | 0.04d    | 0.05a  | 91.93a  |        |
|               |               | OC               | 0.05a     | 0.05a | 0.07a | 0.06a | 101.06a | 144.65a | 124.18a | 0.05abcd | ND     | 104.46a |        |
|               | CDC Precision | AI               | 0.05a     | 0.05a | 0.06a | 0.05a | 98.74a  | 118.52a | 101.88a | 0.05cd   | ND     | 91.11a  |        |
|               |               | FCT              | 0.05a     | 0.04a | 0.10a | 0.06a | 75.55a  | 183.00a | 116.69a | 0.05bcd  | 0.04b  | 95.06a  |        |
|               |               | OC               | 0.06a     | 0.05a | 0.07a | 0.06a | 91.99a  | 124.85a | 106.42a | 0.07ab   | ND     | 121.26a |        |
|               | Transcend     | AI               | 0.05a     | 0.05a | 0.07a | 0.06a | 115.46a | 152.35a | 126.77a | 0.08a    | 0.05a  | 162.61a |        |
|               |               | FCT              | 0.05a     | 0.04a | 0.07a | 0.06a | 99.31a  | 150.38a | 140.12a | 0.07abc  | 0.05a  | 154.00a |        |
|               |               | OC               | 0.05a     | 0.06a | 0.06a | 0.06a | 136.15a | 127.7a  | 143.19a | 0.06abcd | 0.06a  | 154.14a |        |
|               |               | <i>Pooled SE</i> |           | 0.004 | 0.005 | 0.011 | 0.005   | 0.152   | 0.267   | 0.150    | 0.005  | 0.001   | 18.411 |
|               |               | <i>P-value</i>   | <i>V</i>  | 0.120 | 0.541 | 0.110 | 0.345   | 0.092   | 0.308   | 0.073    | <.0001 | 0.006   | 0.001  |
|               |               |                  | <i>CD</i> | 0.467 | 0.011 | 0.566 | 0.280   | 0.226   | 0.525   | 0.637    | 0.143  | 0.056   | 0.677  |
|               |               | <i>V*CD</i>      | 0.776     | 0.751 | 0.119 | 0.526 | 0.835   | 0.326   | 0.946   | 0.017    | -      | 0.881   |        |

All values are means of four determinations (n=4). Pooled SE; Pooled standard error of means assuming equal variances. Data having the same lower-case superscripts within a column and carotenoid are not significantly different ( $p>0.05$ ). #Cooking duration: Al, *al dente*; FCT, fully cooked time; OC, overcooked pasta. Independent variables are represented by the wheat cultivar (V) and cooking duration (CD). ND; Not detected (< LOD).

Table S3a. Significance of wheat cultivar, cooking duration and their interactions on the concentration of total all-trans, total all-cis carotenoids and total carotenoid content (mg/100 g dry weight) in undigested and digested refined semolina (RS) Pasta

| Carotenoid       | Wheat Cultivar   | #Cooking duration | Undigested pasta | Digestion stage |               |                             |                  |                  |    |
|------------------|------------------|-------------------|------------------|-----------------|---------------|-----------------------------|------------------|------------------|----|
|                  |                  |                   |                  | Oral            | Oral+ Gastric | Oral + Gastric + Intestinal | Filtrate         | Residue          |    |
| Total all-trans  | AAC Spitfire     | AI                | 0.60b            | 0.40c           | 0.49a         | 0.88a                       | 0.98d            | 0.21c            |    |
|                  |                  | FCT               | 0.85ab           | 0.48bc          | 0.52a         | 0.71a                       | 0.96d            | 0.26c            |    |
|                  |                  | OC                | 0.86ab           | 0.66abc         | 0.43a         | 0.92a                       | 0.94d            | 0.28bc           |    |
|                  | CDC Precision    | AI                | 0.74ab           | 0.66ab          | 0.52a         | 0.74a                       | 1.55ab           | 0.27bc           |    |
|                  |                  | FCT               | 0.91a            | 0.68ab          | 0.49a         | 0.82a                       | 1.60a            | 0.41a            |    |
|                  |                  | OC                | 0.96a            | 0.73ab          | 0.61a         | 1.07a                       | 0.84d            | 0.45a            |    |
|                  | Transcend        | AI                | 0.69ab           | 0.78a           | 0.40a         | 0.79a                       | 1.46abc          | 0.27c            |    |
|                  |                  | FCT               | 0.73ab           | 0.72ab          | 0.62a         | 1.00a                       | 1.18bcd          | 0.40ab           |    |
|                  |                  | OC                | 0.95a            | 0.47bc          | 0.50a         | 0.71a                       | 1.10cd           | 0.43a            |    |
|                  | <i>Pooled SE</i> |                   | <i>0.065</i>     | <i>0.056</i>    | <i>0.1094</i> | <i>0.1053</i>               | <i>0.08493</i>   | <i>0.02549</i>   |    |
|                  | <i>P-value</i>   | <i>V</i>          | <i>0.156</i>     | <i>0.001</i>    | <i>0.796</i>  | <i>0.859</i>                | <i>0.000</i>     | <i>&lt;.0001</i> |    |
|                  |                  | <i>CD</i>         | <i>0.000</i>     | <i>0.943</i>    | <i>0.723</i>  | <i>0.530</i>                | <i>0.000</i>     | <i>&lt;.0001</i> |    |
|                  |                  | <i>V*CD</i>       | <i>0.403</i>     | <i>0.000</i>    | <i>0.679</i>  | <i>0.062</i>                | <i>0.001</i>     | <i>0.288</i>     |    |
|                  | Total all-Cis    | AAC Spitfire      | AI               | 0.24b           | 0.19c         | 0.21a                       | 0.31a            | 0.33bc           | ND |
|                  |                  |                   | FCT              | 0.33ab          | 0.22bc        | 0.22a                       | 0.26a            | 0.33bc           | ND |
| OC               |                  |                   | 0.32ab           | 0.27abc         | 0.19a         | 0.31a                       | 0.34bc           | ND               |    |
| CDC Precision    |                  | AI                | 0.29ab           | 0.28abc         | 0.21a         | 0.26a                       | 0.45a            | ND               |    |
|                  |                  | FCT               | 0.34a            | 0.28abc         | 0.20a         | 0.28a                       | 0.47a            | ND               |    |
|                  |                  | OC                | 0.34a            | 0.29ab          | 0.25a         | 0.36a                       | 0.31c            | ND               |    |
| Transcend        |                  | AI                | 0.28ab           | 0.32a           | 0.17a         | 0.27a                       | 0.46a            | ND               |    |
|                  |                  | FCT               | 0.29ab           | 0.29ab          | 0.24a         | 0.33a                       | 0.42ab           | ND               |    |
|                  |                  | OC                | 0.35a            | 0.21bc          | 0.20a         | 0.25a                       | 0.31c            | ND               |    |
| <i>Pooled SE</i> |                  |                   | <i>0.020</i>     | <i>0.019</i>    | <i>0.037</i>  | <i>0.032</i>                | <i>0.020</i>     |                  |    |
| <i>P-value</i>   |                  | <i>V</i>          | <i>0.254</i>     | <i>0.004</i>    | <i>0.825</i>  | <i>0.799</i>                | <i>0.001</i>     |                  |    |
|                  |                  | <i>CD</i>         | <i>0.001</i>     | <i>0.882</i>    | <i>0.731</i>  | <i>0.584</i>                | <i>&lt;.0001</i> |                  |    |
|                  |                  | <i>V*CD</i>       | <i>0.392</i>     | <i>0.001</i>    | <i>0.672</i>  | <i>0.078</i>                | <i>0.002</i>     |                  |    |

|                                        |                      |        |        |         |        |        |        |         |
|----------------------------------------|----------------------|--------|--------|---------|--------|--------|--------|---------|
| Total<br>carotenoids<br>(HPLC-<br>PDA) | AAC<br>Spitfire      | AI     | 0.84b  | 0.59c   | 0.70a  | 1.19a  | 1.31b  | 0.21c   |
|                                        |                      | FCT    | 1.18ab | 0.70bc  | 0.73a  | 0.97a  | 1.29b  | 0.26c   |
|                                        |                      | OC     | 1.18ab | 0.93abc | 0.62a  | 1.23a  | 1.29b  | 0.28bc  |
|                                        | CDC<br>Precision     | AI     | 1.02ab | 0.94abc | 0.73a  | 1.00a  | 2.00a  | 0.27bc  |
|                                        |                      | FCT    | 1.25a  | 0.96ab  | 0.69a  | 1.10a  | 2.08a  | 0.41a   |
|                                        |                      | OC     | 1.30a  | 1.02ab  | 0.86a  | 1.42a  | 1.15b  | 0.45a   |
|                                        | Transcend            | AI     | 0.96ab | 1.09a   | 0.56a  | 1.05a  | 1.92a  | 0.27c   |
|                                        |                      | FCT    | 1.02ab | 1.01ab  | 0.85a  | 1.33a  | 1.60ab | 0.40ab  |
|                                        |                      | OC     | 1.31a  | 0.68bc  | 0.70a  | 0.96a  | 1.41b  | 0.43a   |
|                                        | <i>Pooled<br/>SE</i> |        | 0.084  | 0.074   | 0.146  | 0.137  | 0.097  | 0.025   |
| <i>P-value</i>                         | <i>V</i>             | 0.174  | 0.002  | 0.812   | 0.855  | <.0001 | <.0001 |         |
|                                        | <i>CD</i>            | 0.000  | 0.957  | 0.727   | 0.541  | <.0001 | <.0001 |         |
|                                        | <i>V*CD</i>          | 0.395  | 0.000  | 0.677   | 0.065  | 0.001  | 0.288  |         |
| TCC                                    | AAC<br>Spitfire      | AI     | 0.40e  | 0.38e   | 0.27b  | 0.72ab | 0.79b  | 0.33de  |
|                                        |                      | FCT    | 0.50b  | 0.42de  | 0.33a  | 0.71ab | 0.81b  | 0.52a   |
|                                        |                      | OC     | 0.57a  | 0.57a   | 0.25b  | 0.73ab | 0.78b  | 0.40bc  |
|                                        | CDC<br>Precision     | AI     | 0.46bc | 0.54ab  | 0.19c  | 0.65cd | 0.90a  | 0.31e   |
|                                        |                      | FCT    | 0.56a  | 0.51b   | 0.22c  | 0.68bc | 0.92a  | 0.44b   |
|                                        |                      | OC     | 0.54a  | 0.41de  | 0.26b  | 0.72ab | 0.54d  | 0.42b   |
|                                        | Transcend            | AI     | 0.42de | 0.47c   | 0.12d  | 0.53e  | 0.76bc | 0.30e   |
|                                        |                      | FCT    | 0.45cd | 0.42d   | 0.20c  | 0.62d  | 0.70c  | 0.35cde |
|                                        |                      | OC     | 0.55a  | 0.31f   | 0.28b  | 0.76a  | 0.45e  | 0.37bcd |
|                                        | <i>Pooled<br/>SE</i> |        | 0.008  | 0.008   | 0.006  | 0.011  | 0.014  | 0.013   |
| <i>P-value</i>                         | <i>V</i>             | <.0001 | <.0001 | <.0001  | <.0001 | <.0001 | <.0001 |         |
|                                        | <i>CD</i>            | <.0001 | <.0001 | <.0001  | <.0001 | <.0001 | <.0001 |         |
|                                        | <i>V*CD</i>          | <.0001 | <.0001 | <.0001  | <.0001 | <.0001 | 0.000  |         |

Values are means of four determinations (n=4). Pooled SE; Pooled standard error of means assuming equal variances. Data having the same lower-case superscripts within a column and variable are not significantly different (p>0.05). #Cooking duration: AI, *al dente*; FCT, fully cooked time; OC, overcooked pasta. Independent variables are represented by the wheat cultivar (V) and cooking duration (CD). TCC; Total carotenoid content. ND; Not detected (<LOD). All-trans lutein (LOD:1.04 µg/ml, LOQ: 3.14 µg/ml), all-trans zeaxanthin (LOD:0.31 µg/ml, LOQ: 0.93 µg/ml).

Table S3b. Significance of wheat cultivar, cooking duration and their interactions on the concentration of total all-trans, total all-cis carotenoids and total carotenoid content (mg/100 g dry weight) in undigested and digested whole wheat flour (WWF) Pasta.

| Carotenoid      | Wheat Cultivar   | #Cooking duration | Undigested pasta | Digestion stage |               |                             |                  |                  |
|-----------------|------------------|-------------------|------------------|-----------------|---------------|-----------------------------|------------------|------------------|
|                 |                  |                   |                  | Oral            | Oral+ Gastric | Oral + Gastric + Intestinal | Filtrate         | Residue          |
| Total All-trans | AAC Spitfire     | AI                | 0.99a            | 1.09a           | 1.05a         | 1.03a                       | 0.99ab           | 0.28b            |
|                 |                  | FCT               | 0.86a            | 0.80a           | 0.93a         | 0.95a                       | 0.79b            | 0.57a            |
|                 |                  | OC                | 0.85a            | 0.91a           | 1.43a         | 1.08a                       | 0.97ab           | 0.39ab           |
|                 | CDC Precision    | AI                | 0.84a            | 0.92a           | 1.17a         | 0.89a                       | 0.83b            | 0.33b            |
|                 |                  | FCT               | 1.00a            | 0.69a           | 1.87a         | 1.12a                       | 0.89ab           | 0.37ab           |
|                 |                  | OC                | 1.11a            | 1.05a           | 1.19a         | 0.99a                       | 1.27ab           | 0.52ab           |
|                 | Transcend        | AI                | 0.80a            | 1.04a           | 1.42a         | 1.02a                       | 1.35a            | 0.48ab           |
|                 |                  | FCT               | 1.00a            | 0.84a           | 1.32a         | 1.13a                       | 1.28ab           | 0.59a            |
|                 |                  | OC                | 0.97a            | 1.12a           | 1.07a         | 1.15a                       | 1.15ab           | 0.61a            |
|                 | <i>Pooled SE</i> |                   | <i>0.071</i>     | <i>0.105</i>    | <i>0.235</i>  | <i>0.076</i>                | <i>0.1023</i>    | <i>0.051</i>     |
|                 | <i>P-value</i>   | <i>V</i>          | <i>0.381</i>     | <i>0.430</i>    | <i>0.375</i>  | <i>0.233</i>                | <i>0.001</i>     | <i>0.001</i>     |
|                 |                  | <i>CD</i>         | <i>0.146</i>     | <i>0.010</i>    | <i>0.662</i>  | <i>0.268</i>                | <i>0.253</i>     | <i>0.002</i>     |
| <i>V*CD</i>     |                  | <i>0.053</i>      | <i>0.598</i>     | <i>0.118</i>    | <i>0.299</i>  | <i>0.033</i>                | <i>0.034</i>     |                  |
| Total All-Cis   | AAC Spitfire     | AI                | 0.31a            | 0.28ab          | 0.27a         | 0.29ab                      | 0.30ab           | 0.14d            |
|                 |                  | FCT               | 0.29a            | 0.23ab          | 0.27a         | 0.29ab                      | 0.27b            | 0.28ab           |
|                 |                  | OC                | 0.31a            | 0.27ab          | 0.37a         | 0.34ab                      | 0.32ab           | 0.11de           |
|                 | CDC Precision    | AI                | 0.28a            | 0.23ab          | 0.29a         | 0.26b                       | 0.26b            | 0.09e            |
|                 |                  | FCT               | 0.32a            | 0.19b           | 0.42a         | 0.33ab                      | 0.29ab           | 0.22c            |
|                 |                  | OC                | 0.36a            | 0.27ab          | 0.33a         | 0.32ab                      | 0.39a            | 0.13d            |
|                 | Transcend        | AI                | 0.27a            | 0.28ab          | 0.36a         | 0.28ab                      | 0.38ab           | 0.23c            |
|                 |                  | FCT               | 0.29a            | 0.25ab          | 0.37a         | 0.34ab                      | 0.38ab           | 0.25bc           |
|                 |                  | OC                | 0.29a            | 0.30a           | 0.30a         | 0.35a                       | 0.37ab           | 0.28a            |
|                 | <i>Pooled SE</i> |                   | <i>0.026</i>     | <i>0.021</i>    | <i>0.053</i>  | <i>0.019</i>                | <i>0.025</i>     | <i>0.006</i>     |
|                 | <i>P-value</i>   | <i>V</i>          | <i>0.258</i>     | <i>0.029</i>    | <i>0.564</i>  | <i>0.376</i>                | <i>0.001</i>     | <i>&lt;.0001</i> |
|                 |                  | <i>CD</i>         | <i>0.225</i>     | <i>0.009</i>    | <i>0.511</i>  | <i>0.002</i>                | <i>0.061</i>     | <i>&lt;.0001</i> |
| <i>V*CD</i>     |                  | <i>0.474</i>      | <i>0.722</i>     | <i>0.272</i>    | <i>0.271</i>  | <i>0.087</i>                | <i>&lt;.0001</i> |                  |

|                                        |                  |                  |         |         |        |        |         |          |
|----------------------------------------|------------------|------------------|---------|---------|--------|--------|---------|----------|
| Total<br>carotenoids<br>(HPLC-<br>PDA) | AAC<br>Spitfire  | Al               | 1.30a   | 1.37a   | 1.31a  | 1.32a  | 1.29ab  | 0.35a    |
|                                        |                  | FCT              | 1.14a   | 1.03a   | 1.20a  | 1.23a  | 1.06b   | 0.71a    |
|                                        |                  | OC               | 1.16a   | 1.18a   | 1.80a  | 1.42a  | 1.29ab  | 0.45a    |
|                                        | CDC<br>Precision | Al               | 1.11a   | 1.14a   | 1.46a  | 1.15a  | 1.09b   | 0.37a    |
|                                        |                  | FCT              | 1.32a   | 0.88a   | 2.29a  | 1.45a  | 1.18ab  | 0.48a    |
|                                        |                  | OC               | 1.48a   | 1.32a   | 1.52a  | 1.31a  | 1.65ab  | 0.59a    |
|                                        | Transcend        | Al               | 1.07a   | 1.32a   | 1.78a  | 1.31a  | 1.73a   | 0.60a    |
|                                        |                  | FCT              | 1.30a   | 1.08a   | 1.69a  | 1.46a  | 1.66ab  | 0.72a    |
|                                        |                  | OC               | 1.26a   | 1.42a   | 1.37a  | 1.51a  | 1.51ab  | 0.75a    |
|                                        |                  | <i>Pooled SE</i> |         | 0.093   | 0.126  | 0.288  | 0.094   | 0.127    |
|                                        | <i>P-value</i>   | <i>V</i>         | 0.329   | 0.306   | 0.416  | 0.255  | 0.001   | 0.020    |
|                                        |                  | <i>CD</i>        | 0.198   | 0.010   | 0.648  | 0.124  | 0.213   | 0.039    |
|                                        |                  | <i>V*CD</i>      | 0.072   | 0.618   | 0.141  | 0.288  | 0.040   | 0.336    |
| TCC                                    | AAC<br>Spitfire  | Al               | 0.78ab  | 1.04bc  | 1.15ab | 0.65ab | 0.83abc | 0.49e    |
|                                        |                  | FCT              | 0.75abc | 1.07ab  | 1.09ab | 0.68a  | 0.76c   | 1.05a    |
|                                        |                  | OC               | 0.79a   | 1.13a   | 1.09ab | 0.65ab | 0.92abc | 0.62bcd  |
|                                        | CDC<br>Precision | Al               | 0.64ef  | 0.96bc  | 1.02ab | 0.64ab | 0.74c   | 0.57cde  |
|                                        |                  | FCT              | 0.69de  | 0.96cd  | 1.16a  | 0.62ab | 0.92abc | 0.67bc   |
|                                        |                  | OC               | 0.73bcd | 0.99bcd | 0.97b  | 0.64ab | 0.99ab  | 0.69b    |
|                                        | Transcend        | Al               | 0.59f   | 0.86e   | 1.00ab | 0.52c  | 1.02a   | 0.52de   |
|                                        |                  | FCT              | 0.66e   | 0.92de  | 1.07ab | 0.58bc | 0.81bc  | 0.64bc   |
|                                        |                  | OC               | 0.72cd  | 0.95d   | 1.06ab | 0.62ab | 0.99ab  | 0.59bcde |
|                                        |                  | <i>Pooled SE</i> |         | 0.011   | 0.017  | 0.035  | 0.016   | 0.039    |
|                                        | <i>P-value</i>   | <i>V</i>         | <.0001  | <.0001  | 0.066  | <.0001 | 0.025   | <.0001   |
|                                        |                  | <i>CD</i>        | <.0001  | 0.000   | 0.085  | 0.044  | 0.002   | <.0001   |
|                                        |                  | <i>V*CD</i>      | 0.000   | 0.390   | 0.027  | 0.019  | 0.002   | <.0001   |

Values are means of four determinations (n=4). Pooled SE; Pooled standard error of means assuming equal variances. Data having the same lower-case superscripts within a column and variable are not significantly different ( $p>0.05$ ). #Cooking duration: Al, *al dente*; FCT, fully cooked time; OC, overcooked pasta. Independent variables are represented by the wheat cultivar (V) and cooking duration (CD). TCC; Total carotenoid content. ND; Not detected (<LOD). All-trans lutein (LOD:1.04  $\mu\text{g/ml}$ , LOQ: 3.14  $\mu\text{g/ml}$ ), all-trans zeaxanthin (LOD:0.31  $\mu\text{g/ml}$ , LOQ: 0.93  $\mu\text{g/ml}$ ).

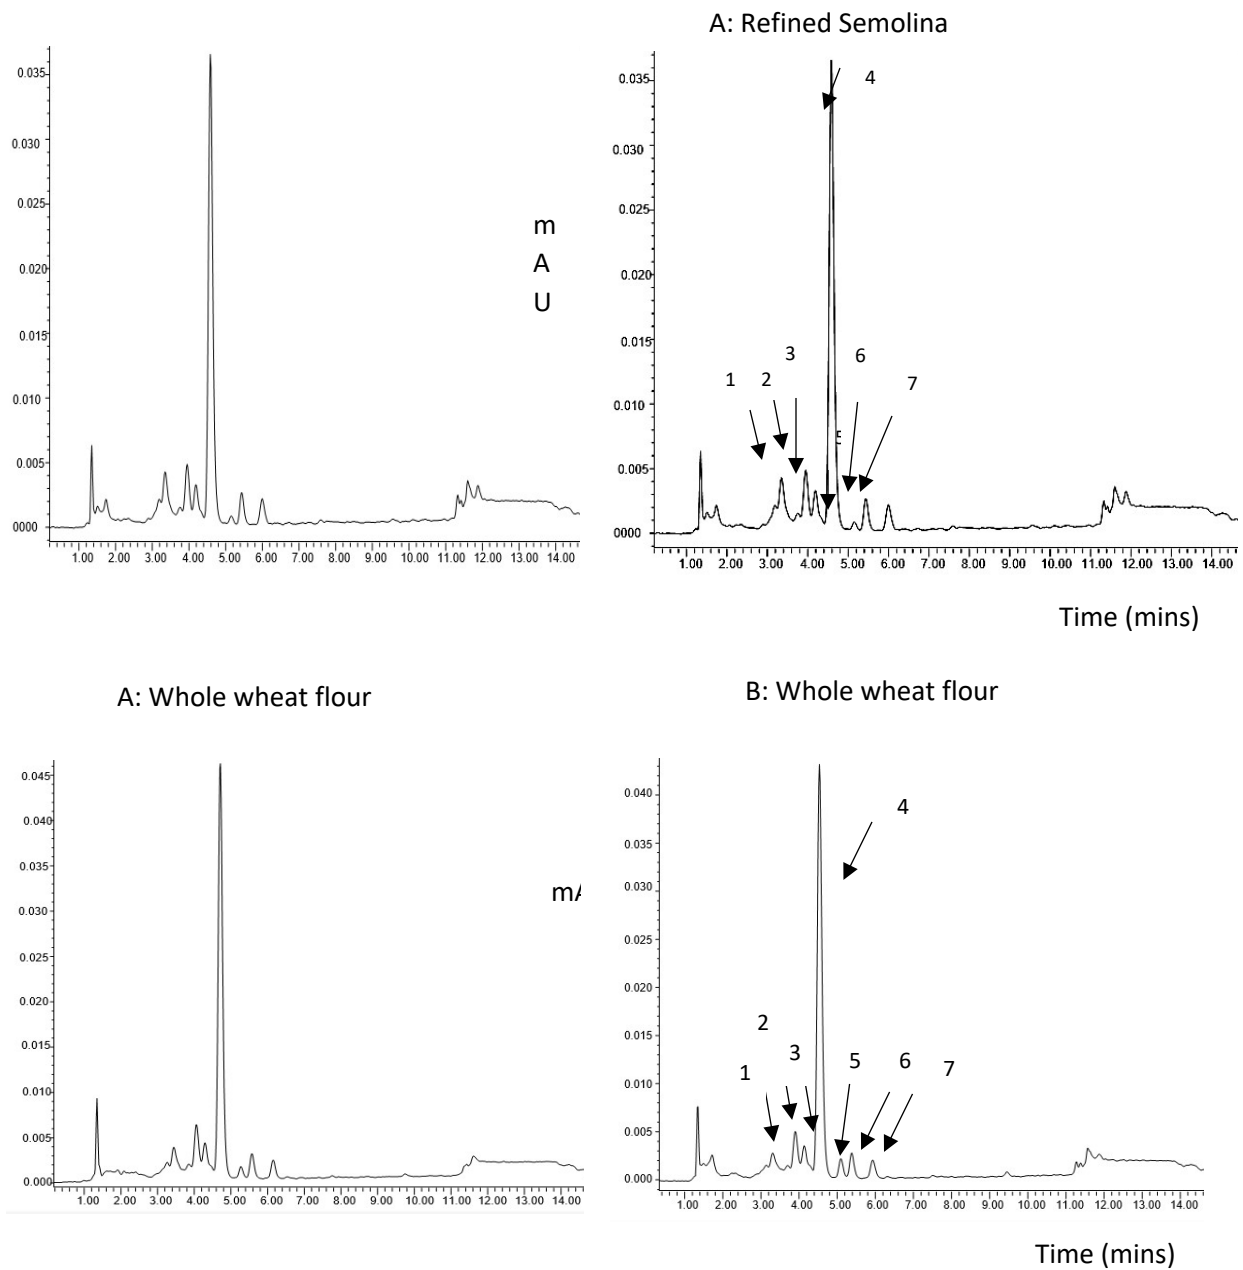

Fig. S1 Sample chromatograms obtained by HPLC -PDA at 450 nm of carotenoid extracts from undigested (A) and digested (B) refined semolina pasta and whole wheat flour pasta cooked to al dente of the Transcend wheat cultivar. Peak assignment: 1- 15-cis lutein, 2- 13-cis lutein, 3- 13'-cis lutein, 4- all-trans lutein, 5- all-trans zeaxanthin, 6- 9-cis lutein, 7- 9'-cis lutein.
